# Supplementary material for: An Obligatory Role of NF-κB in Mediating Bone Marrow Derived Endothelial Progenitor Cell Recruitment and Proliferation Following Endotoxemic Multiple Organ Injury in Mice
Source: PubMed Central journal article supplement (PMC4205081; doi:10.1371/journal.pone.0111087), 2014-10-21

Figure S2

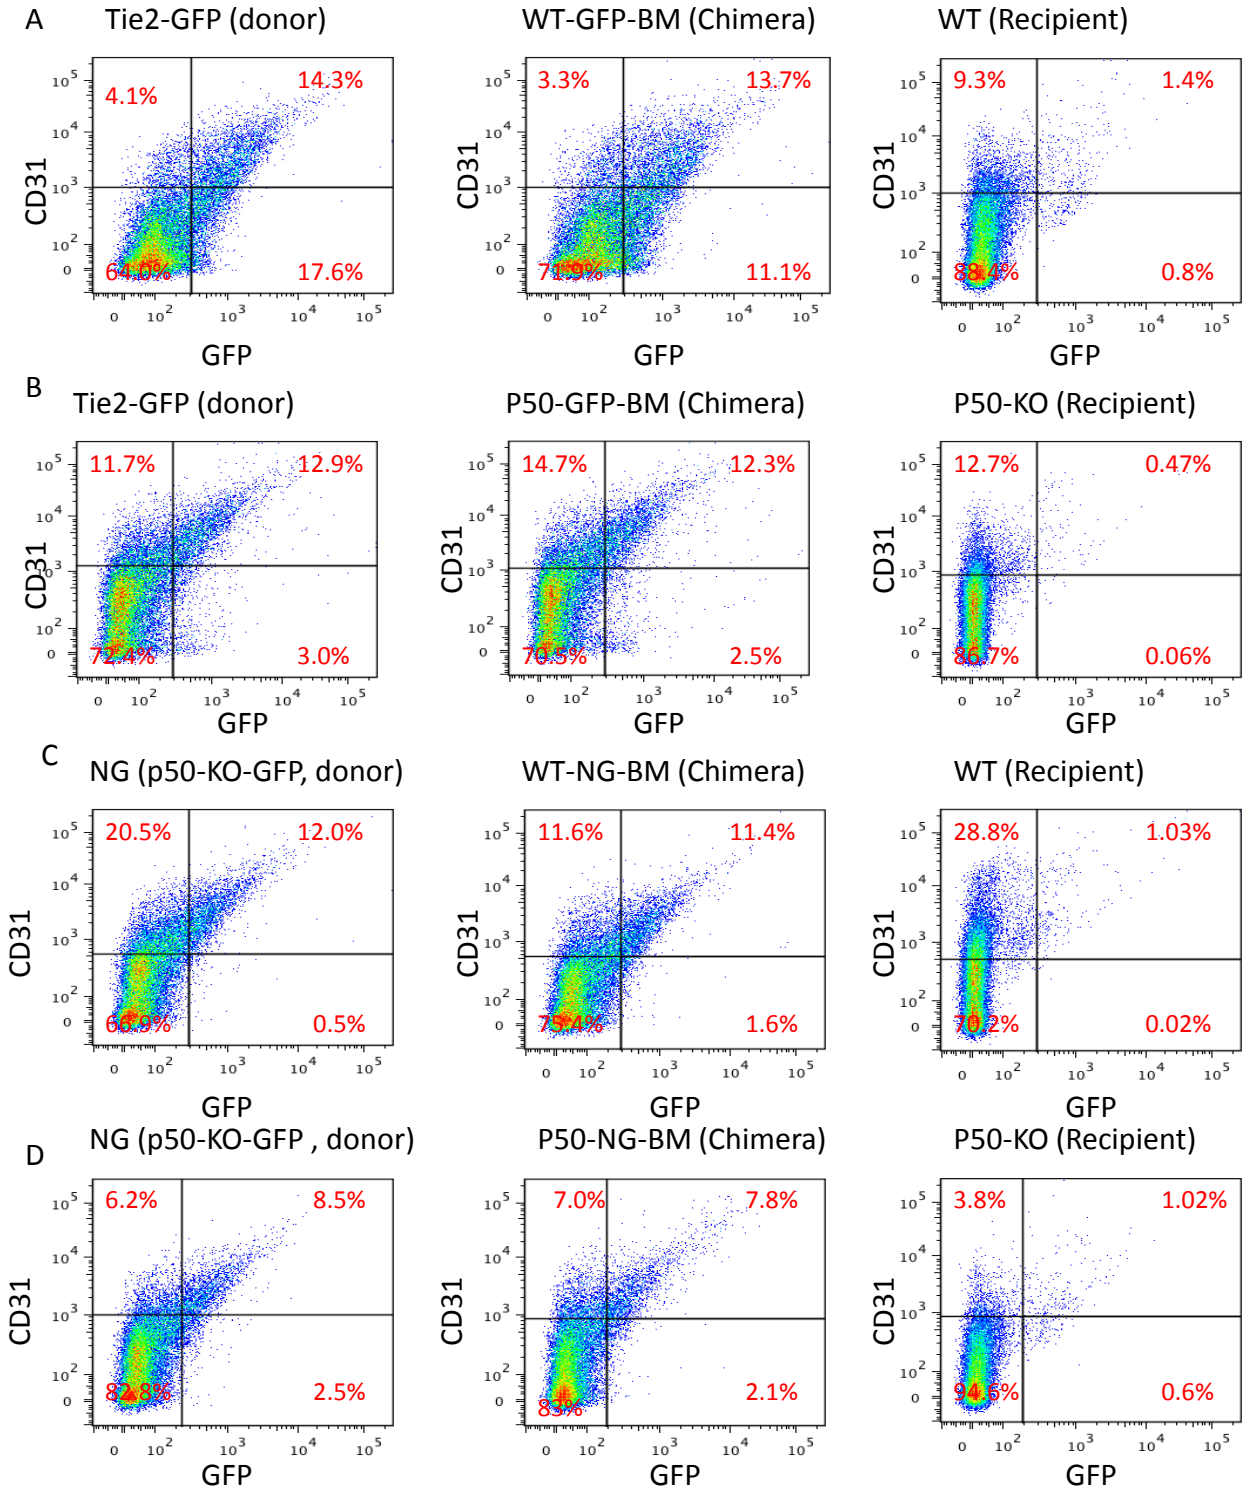

Supplement: pone.0111087.s002.pdf [file pone.0111087.s002.pdf]
