# Supplementary material for: An Obligatory Role of NF-κB in Mediating Bone Marrow Derived Endothelial Progenitor Cell Recruitment and Proliferation Following Endotoxemic Multiple Organ Injury in Mice
Source: PubMed Central journal article supplement (PMC4205081; doi:10.1371/journal.pone.0111087), 2014-10-21
Supplement: pone.0111087.s003.pdf [file pone.0111087.s003.pdf]

## Online Support Information

**Table S1. Mouse strains used**

| Strains    | Characteristics                                                                                  |
|------------|--------------------------------------------------------------------------------------------------|
| P50-KO     | Mice deficient in NF- $\kappa$ B p50 gene                                                        |
| Tie2-GFP   | Mice overexpressing Tie2-GFP on endothelial lineage cells                                        |
| NG         | Mice deficient in p50 gene in all cell types and overexpressing GFP on endothelial lineage cells |
| WT-GFP-BM  | Mice with an intact p50 gene and overexpressing GFP on BMDEPCs.                                  |
| P50-NG-BM  | Mice deficient in p50 gene in all cells and overexpressing GFP on BMDEPCs.                       |
| P50-GFP-BM | Mice deficient in p50 gene in stromal/parenchymal cells and overexpressing GFP on BMDEPCs.       |
| WT-NG-BM   | Mice deficient in p50 gene in bone marrow/blood cells and overexpressing GFP on BMDEPCs.         |
